# Supplementary material for: Cytokine-Induced β-Cell Death Is Independent of Endoplasmic Reticulum Stress Signaling
Source: Oxford University Press journal article supplement (doi:10.2337/db07-1802), 2008-07-01
Supplement: db07-18021_suppl.doc [file db07-18021_suppl.doc]

**SUPPLEMENTARY TABLE 1**

Sequences of oligonucleotide primers.

| Gene | Size (bp) | 5' Oligonucleotide | 3' Oligonucleotide |
| --- | --- | --- | --- |
| ATF41 | 214 | AATGGCTGGCTATGGATGGG | TGTCTGAGGGGGCTCCTTATTAG |
| ATF42 | 217 | ATCCAGCAAAGCCCCACAAC | CAAGCCATCATCCATAGCCG |
| BiP2 | 262 | AGGACAAGAAGGAGGATGTGGG | ACCGAAGGGTCATTCCAAGTG |
| Car61 | 221 | GAAGAAGAGAAACCACAGCCATTG | CATCCATCCAAGTCCATTCGG |
| CHOP1,2 | 176 | TTCACTACTCTTGACCCTGCGTC | CACTGACCACTCTGTTTCCGTTTC |
| Edem12 | 157 | GCAATGAAGGAGAAGGAGACCC | TAGAAGGCGTGTAGGCAGATGG |
| Fas2 | 215 | AACCAGACTTCTACTGCGATTCTCC | CCTTTTCCAGCACTTTCTTTTCCG |
| Gadd341 | 159 | CTGAAAATCACCTACCTCTCCGAG | CTTGTCCTGGCTTCCCATTATG |
| GRP942 | 193 | AAACGGCAACACTTCGGTCAG | GCATCCATCTCTTCTCCCTCATC |
| MCP-12 | 163 | CCACTCACCTGCTGCTACTCATTC | TCTGGACCCATTCCTTCTTGG |
| p582 | 160 | AAGCCCGTGGAAGCCATTAG | GGTCATTTTCATTGTGCTCCTGAG |
| XBP1s1,2 | 601 | AAACAGAGTAGCAGCGCAGACTGC | GGATCTCTAAAACTAGAGGCTTGGTG |
| MCP-12 | 163 | CCACTCACCTGCTGCTACTCATTC | TCTGGACCCATTCCTTCTTGG |

1 Rat, 2 Mouse

**
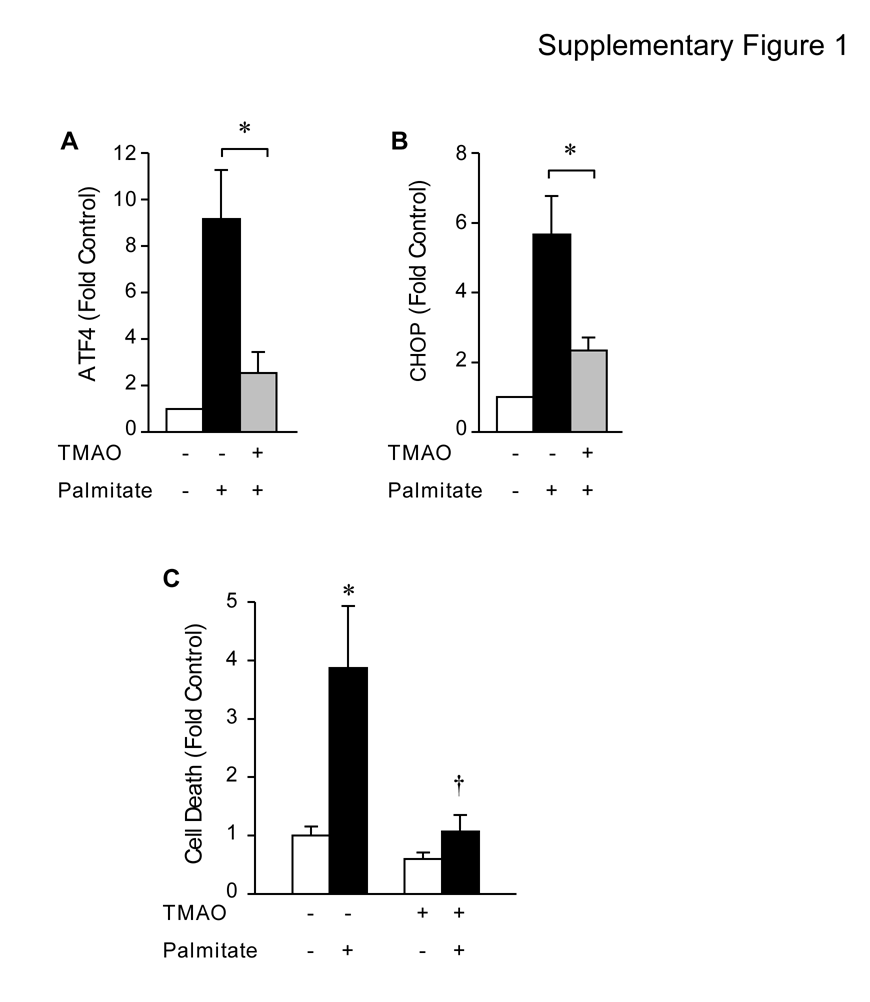
Supplementary Figure 1. TMAO treatment protects against palmitate-induced ER stress and cell death in INS-1 cells.** INS-1 cells grown in RPMI 1640 were pre-treated in the absence or presence of TMAO (100 mM) for 24 h and then cultured in combination with 0.4 mM palmitate coupled to 0.92% BSA for 6 h as indicated. **A.** ATF4 and **B.** CHOP Western blots were quantified by densitometry and are expressed as fold-change compared with control. Results are means ± SEM determined from four experiments. **p*<0.05, TMAO + palmitate-treated *versus* control palmitate-treated INS-1 cells. **C.** Cell death was measured using a cell death detection ELISA. Results are means ± SEM determined from three experiments performed in triplicate and are expressed as fold-change compared with control. **p*<0.05, control palmitate-treated *versus* control untreated INS-1 cells, †*p*<0.05, TMAO + palmitate-treated *versus* control palmitate-treated INS-1 cells.

**
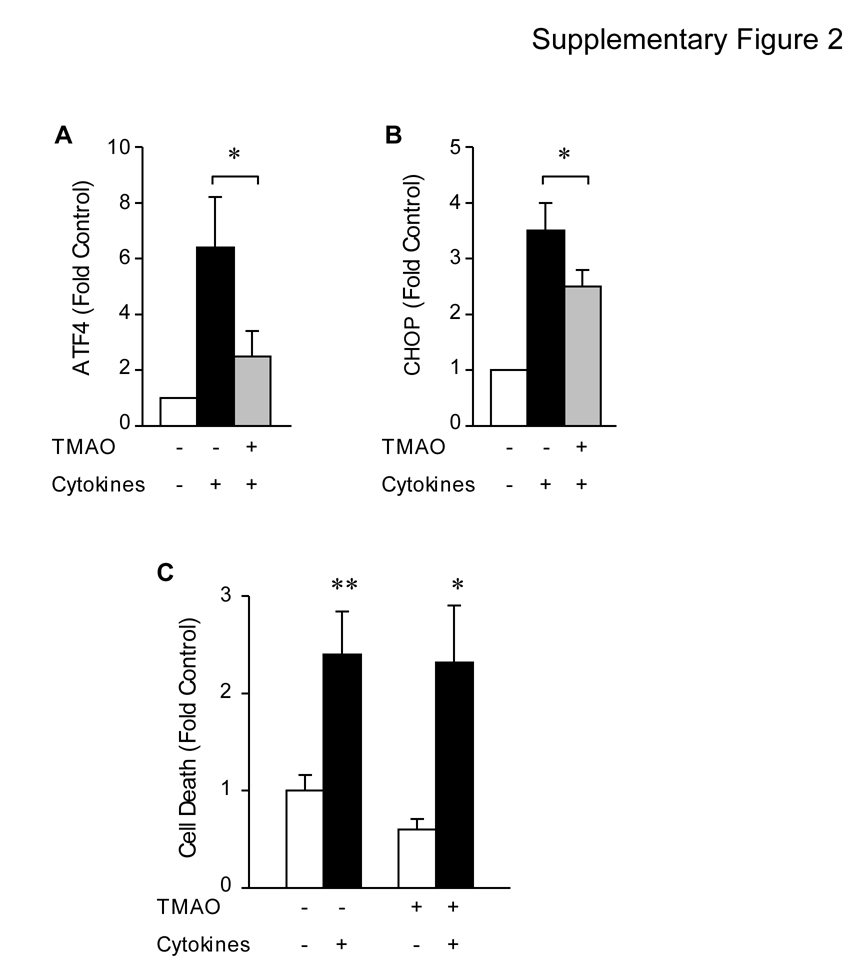
Supplementary Figure 2. TMAO-mediated reduction of ER stress does not protect against cytokine-induced cell death in INS-1 cells.** INS-1 cells grown in RPMI 1640 were pre-treated in the absence or presence of TMAO (100 mM) for 24 h and then cultured in combination with IL1-β (50 U/ml) and IFN-γ (100 U/ml) for 6 h as indicated. **A.** ATF4 and **B.** CHOP Western blots were quantified by densitometry and are expressed as fold-change compared with control. Results are means ± SEM determined from four experiments. **p*<0.05, TMAO + cytokine-treated *versus* control cytokine-treated INS-1 cells. **C.** Cell death was measured using a cell death detection ELISA. Results are means ± SEM determined from three experiments performed in triplicate and are expressed as fold-change compared with control. **p*<0.05, ***p*<0.001, *versus* control untreated INS-1 cells.

**
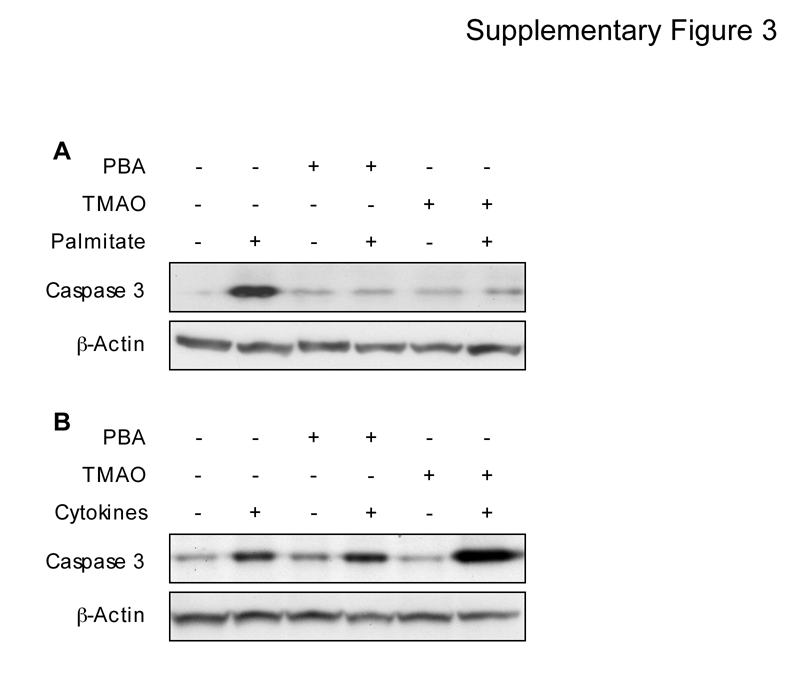
**

**Supplementary Figure 3. PBA and TMAO treatment reduces cleaved caspase-3 expression in response to palmitate, but not in response to cytokines.** INS-1 cells were pre-treated in the absence or presence of PBA (2.5 mM) or TMAO (100 mM) for 24 h and then cultured for 6 h in combination with the absence or presence of **A.** 0.4 mM palmitate coupled to 0.92% BSA, or **B.** IL1-β (50 U/ml) and IFN-γ (100 U/ml). Western blot analysis comparing changes in cleaved caspase-3 expression. -actin protein served as loading control. Representative images are shown from four experiments.

**
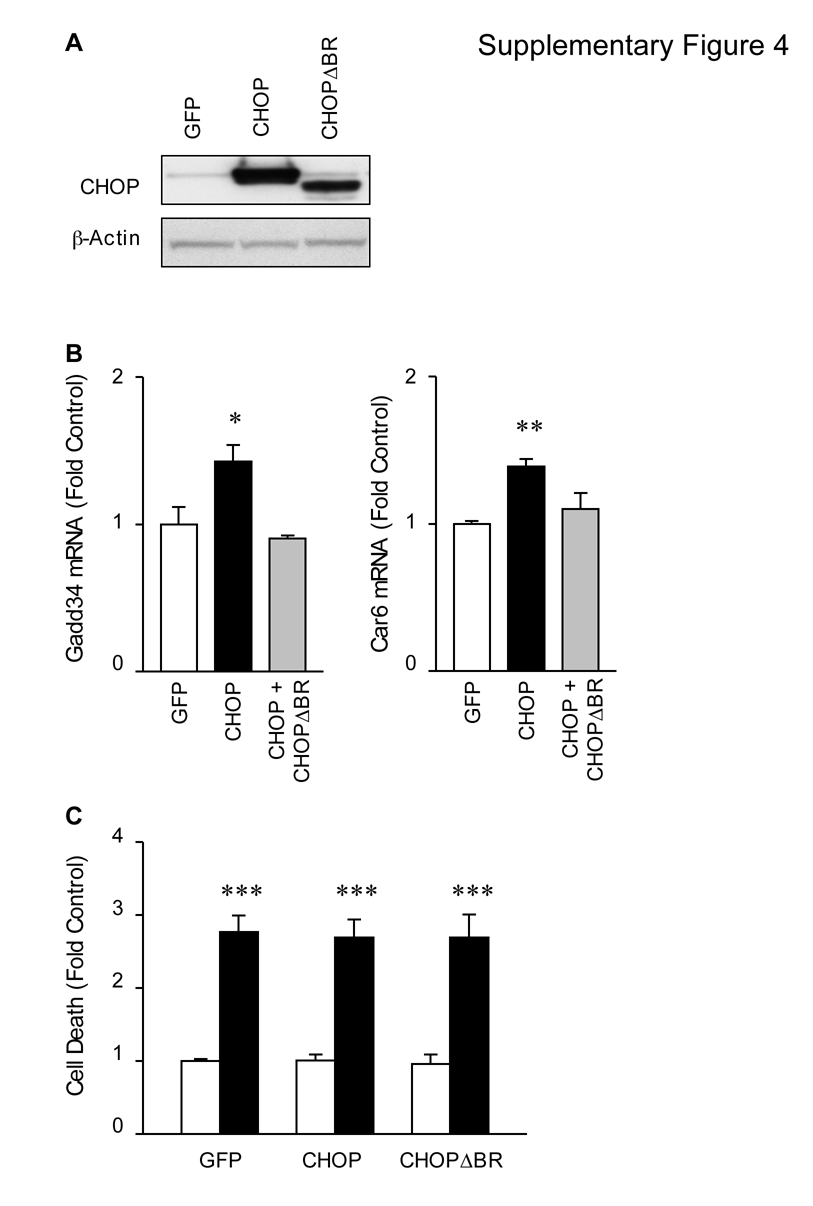
Supplementary Figure 4. Overexpression or inhibition of CHOP in MIN6 cells does not influence basal or cytokine-induced cell death.** MIN6 cells were transfected with an expression vector encoding for GFP, wildtype CHOP or dominant-negative mutant CHOP (CHOP∆BR) by nucleofection. **A.** Western blot analysis of CHOP in GFP-, CHOP and CHOP∆BR overexpressing MIN6 cells. **B.** Effect of transfecting CHOP or co-transfecting CHOP + CHOP∆BR on Gadd34 and Car6 mRNA levels in MIN6 cells. Total RNA was extracted and mRNA levels analysed by real-time RT-PCR. Results are means ± SEM and are expressed as fold-change of mRNA levels in control GFP-overexpressing cells. *n* = 4 in each group. **p*<0.05, ***p*<0.01, *versus* control GFP-overexpressing cells. **B.** Effect of CHOP overexpression or inhibition on cell death in MIN6 cells. GFP, CHOP or CHOP∆BR overexpressing MIN6 cells were cultured in the absence (open bars) or presence (dark bars) of IL1-β (50 U/ml), IFN-γ (100 U/ml), and TNF (100 U/ml). Cell death was measured using a cell death detection ELISA. Results are means ± SEM determined from three experiments performed in duplicate. ****p*<0.001 *versus* untreated GFP-overexpressing cells.
